# Supplementary material for: Continuously Vegetation Greening over Inner Mongolia for the Past Three Decades
Source: MDPI journal article supplement (doi:10.3390/rs13132446), 2021-06-23
Supplement: s1 [file s1]

Archive with 1 entries (1 files):
- remotesensing-1235618-supplementary.pdf
